# Supplementary material for: Beneficial Effect of Mildly Pasteurized Whey Protein on Intestinal Integrity and Innate Defense in Preterm and Near-Term Piglets
Source: MDPI journal article supplement (doi:10.3390/nu12041125), 2020-04-17
Supplement: s1 [file s1]

**Table S1: Macroscopic parameters evaluated to assess severity of gastroenterocolitis.**

| Score | Macroscopic lesions                                                     |
|-------|-------------------------------------------------------------------------|
| 1     | No or minimal hyperaemic gastroenterocolitis                            |
| 2     | Mild focal gastroenterocolitis                                          |
| 3     | Moderate local extensive gastroenterocolitis                            |
| 4     | Severe focal gastroenterocolitis                                        |
| 5     | Severe local extensive haemorrhagic and necrotizing gastroenterocolitis |
| 6     | Extensive haemorrhagic and necrotizing gastroenterocolitis              |

**Table S2: Parameters evaluated to obtain total histology score.** Score of all 5 parameters was added up to obtain a total histology score ranging from 0-15 for the small intestine. For the colon, villus atrophy was not included and score of remaining 4 parameters was added up to obtain a total histology score (0-12).

| score        | Edema                                  | Epithelial damage        | Erythrocytes                | Infiltration      | Villus atrophy      |
|--------------|----------------------------------------|--------------------------|-----------------------------|-------------------|---------------------|
| 0 = none     | none                                   | Intact epithelium        | absent / normal             | none              | Normal villi        |
| 1 = mild     | some in lamina propria                 | Flattened / disorganized | increased in lamina propria | between crypts    | Blunted villi       |
| 2 = moderate | throughout lamina propria and/or villi | Disrupted / discontinued | Patchy between crypts       | in lamina propria | Short & thick villi |
| 3 = severe   | extreme                                | Loss of epithelium       | extreme, throughout         | transmural        | Flat & absent villi |

Table S3: List of qPCR primers used

| Gene                          | Forward primer (5'-3')   | Reverse primer (5'-3')    | NM number      |
|-------------------------------|--------------------------|---------------------------|----------------|
| <i>ACTB</i>                   | CACGCCATCCTGCGTCTGGA     | AGCACCGTGTTGGCGTAGAG      | XM_021086047   |
| <i>GAPDH</i>                  | ACACTCACTCTTCTACCTTTG    | CAAATTCATTGTCGTACCAG      | NM_001206359.1 |
| <i>GUSB</i>                   | TAACAAGCACGAGGATGCAG     | TCCTCTGCGTAGGGGTAGTG      | NM_001123121   |
| <i>HPRT1</i>                  | GGACTTGAATCATGTTTGTG     | CAGATGTTTCCAACTCAAC       | NM_001032376.2 |
| <i>RPL4</i>                   | CAAGAGTAACTACAACCTTC     | GAAGTCTACGATGAATCTTC      | XM_005659862.3 |
| <i>RPL19</i>                  | GCTTGCCTCCAGTGCCTC       | GCGTTGGCGATTCATTAG        | XM_003131509   |
| <i>CD14</i>                   | CCTCAGACTCCGTAATGTG      | CCGGGATTGTCAGATAGG        | NM_001097445.2 |
| <i>CHGA</i>                   | AAGTCATTGCCCTCCCTGTG     | AGATGACCTCGACGATGCAC      | NM_001164005.2 |
| <i>FABP2</i>                  | TGAATCAGCTGGAGACTATGG    | TTTACCACGTTAATACCCATTTTT  | NM_001031780.1 |
| <i>iALP</i>                   | TCCCAGACATACAACGTGGA     | GGTCTGGTAGTTGGCCTTGA      | XM_003133729.4 |
| <i>IL18</i>                   | GAAGTGATGGCTAACTACGGTGAC | TCTCAGAGAACCAAGGTCCAGGT   | NM_214055.1    |
| <i>IL6</i>                    | TGGCTACTGCCTTCCCTACC     | CAGAGATTTTGCCGAGGATG      | NM_214399.1    |
| <i>IL8</i>                    | GAAGAGAACTGAGAAGCAACAACA | TTGTGTTGGCATCTTTACTGAGA   | NM_213867.1    |
| <i>IL10</i>                   | CGTAATGCCGAAGGCAGAGA     | CTTGGAGCTTGCTAAAGGCAC     | NM_214041.1    |
| <i>IL18</i>                   | CGATGAAGACCTGGAATCGG     | CATCATGTCCAGGAACACTTCTCTG | NM_213997.1    |
| <i>IL22</i>                   | AGCAGCCCTACATCACCAAC     | GCATTAAGAGTAATCAGCAGTACCT | XM_021091967.1 |
| <i>LYZ</i>                    | GGTCTATGATCGGTGCGAGT     | AACTGCTTTGGGTGTCTTGC      | NM_214392.2    |
| <i>MUC1</i>                   | GTGCCGACGAAAGAACTG       | TGCCAGGTTTCAGTAAGAG       | XM_021089728.1 |
| <i>MUC2</i>                   | GGCTGCTCATTGAGAGGAGT     | ATGTTCCCGAACTCCAAGG       | XM_021082584   |
| <i>OLFM4</i>                  | GTCAGCAAACCGGCTATTGT     | TGCCTTGGCCATAGGAAATA      | XM_003482903   |
| <i>TNF<math>\alpha</math></i> | CACGTTGTAGCCAATGTCAAAG   | GAGGTACAGCCCATCTGTCTG     | NM_214022.1    |
| <i>TLR4</i>                   | CAGATAAGCGAGGCCGTCATT    | TTGCAGCCCACAAAAAGCA       | NM_001293316   |
| <i>VIL1</i>                   | TGGGGACAAAGGTCGCT        | TGCCATAGGTGCTGGAAGAAA     | XM_001925167.6 |

**Table S4: Clinical characteristics of preterm and near-term piglets on EH-WPC or MP-WPC diet for 5 days.** Values are median  $\pm$  IQR, medians not sharing the same superscript letter differ significantly ( $p \leq 0.05$ ).

|                                                                         | Preterm piglets             |                             | Near-term piglets           |                             |
|-------------------------------------------------------------------------|-----------------------------|-----------------------------|-----------------------------|-----------------------------|
|                                                                         | EH-WPC                      | MP-WPC                      | EH-WPC                      | MP-WPC                      |
| n                                                                       | 17                          | 17                          | 9                           | 8                           |
| Birthweight (g)                                                         | 955 $\pm$ 369 <sup>a</sup>  | 942 $\pm$ 287 <sup>a</sup>  | 1183 $\pm$ 495 <sup>b</sup> | 1184 $\pm$ 475 <sup>b</sup> |
| Drop-outs (n)                                                           | 3                           | 3                           | -                           | -                           |
| Birthweight (g)<br><i>excl. drop-outs</i>                               | 941 $\pm$ 405 <sup>a</sup>  | 919 $\pm$ 272 <sup>a</sup>  | -                           | -                           |
| Weight day 5 (g)<br><i>excl. drop-outs</i>                              | 1067 $\pm$ 484 <sup>a</sup> | 1015 $\pm$ 394 <sup>a</sup> | 1356 $\pm$ 638 <sup>b</sup> | 1328 $\pm$ 558 <sup>b</sup> |
| Increase bodyweight<br>(g/kg·day <sup>-1</sup> ) <i>excl. drop-outs</i> | 2.1 $\pm$ 2.1 <sup>a</sup>  | 2.0 $\pm$ 1.6 <sup>a</sup>  | 3.6 $\pm$ 1.5 <sup>b</sup>  | 2.9 $\pm$ 0.8 <sup>b</sup>  |
| Increase bodyweight (%)<br><i>excl. drop-outs</i>                       | 11 $\pm$ 9.8 <sup>a</sup>   | 10 $\pm$ 7.3 <sup>a</sup>   | 18 $\pm$ 7.5 <sup>b</sup>   | 15 $\pm$ 3.8 <sup>b</sup>   |
| Standing (hrs after birth)<br><i>excl. drop-outs</i>                    | 25 $\pm$ 8 <sup>a</sup>     | 26 $\pm$ 9 <sup>a</sup>     | 11 $\pm$ 16 <sup>b</sup>    | 5 $\pm$ 13 <sup>b</sup>     |
| Liver (g/kg)<br><i>excl. drop-outs</i>                                  | 29 $\pm$ 4.7 <sup>a</sup>   | 30 $\pm$ 5.3 <sup>a</sup>   | 30 $\pm$ 5.5 <sup>a</sup>   | 29 $\pm$ 4.7 <sup>a</sup>   |
| Spleen (g/kg)<br><i>excl. drop-outs</i>                                 | 2.1 $\pm$ 1.0 <sup>a</sup>  | 1.5 $\pm$ 0.7 <sup>b</sup>  | 2.3 $\pm$ 0.7 <sup>a</sup>  | 2.1 $\pm$ 0.8 <sup>a</sup>  |
| Stomach (g/kg)<br><i>excl. drop-outs</i>                                | 7.3 $\pm$ 2.9 <sup>a</sup>  | 6.4 $\pm$ 2.1 <sup>a</sup>  | 7.3 $\pm$ 3.2 <sup>a</sup>  | 5.5 $\pm$ 1.1 <sup>b</sup>  |
| Small intestine (g/kg)<br><i>excl. drop-outs</i>                        | 31 $\pm$ 4.3 <sup>a</sup>   | 32 $\pm$ 6.1 <sup>a</sup>   | 30 $\pm$ 11 <sup>a</sup>    | 29 $\pm$ 3.0 <sup>a</sup>   |
| Colon (g/kg)<br><i>excl. drop-outs</i>                                  | 12 $\pm$ 2.0 <sup>a</sup>   | 11 $\pm$ 3.1 <sup>a</sup>   | 12 $\pm$ 2.1 <sup>a</sup>   | 11 $\pm$ 1.5 <sup>a</sup>   |
