# Supplementary material for: Beneficial Effect of Mildly Pasteurized Whey Protein on Intestinal Integrity and Innate Defense in Preterm and Near-Term Piglets
Source: MDPI journal article supplement (doi:10.3390/nu12041125), 2020-04-17
Supplement: s1 [file s1]

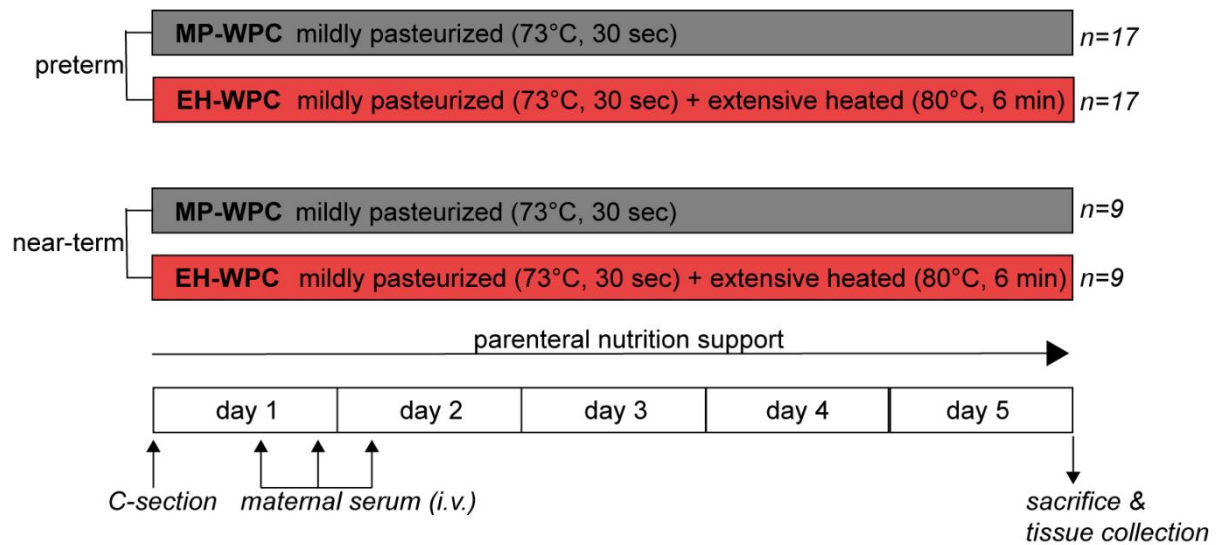

**Figure S1: Experimental set-up.** Preterm and near-term piglets were delivered by caesarean section at 90% gestation (n=34, 2 litters) and 96% gestation (n=18, 1 litter) respectively. Piglets from each litter were stratified according to birthweight into 2 groups of enteral diets, 1) MP-WPC and 2) EH-WPC. In addition to the enteral nutrition, all piglets received parenteral nutrition support from day 1 to day 5. For passive immunization, piglets received three doses of maternal serum (iv). On day 5 the piglets were euthanized, followed by macroscopic evaluation of gastroenterocolitis and collection of intestinal tissues.

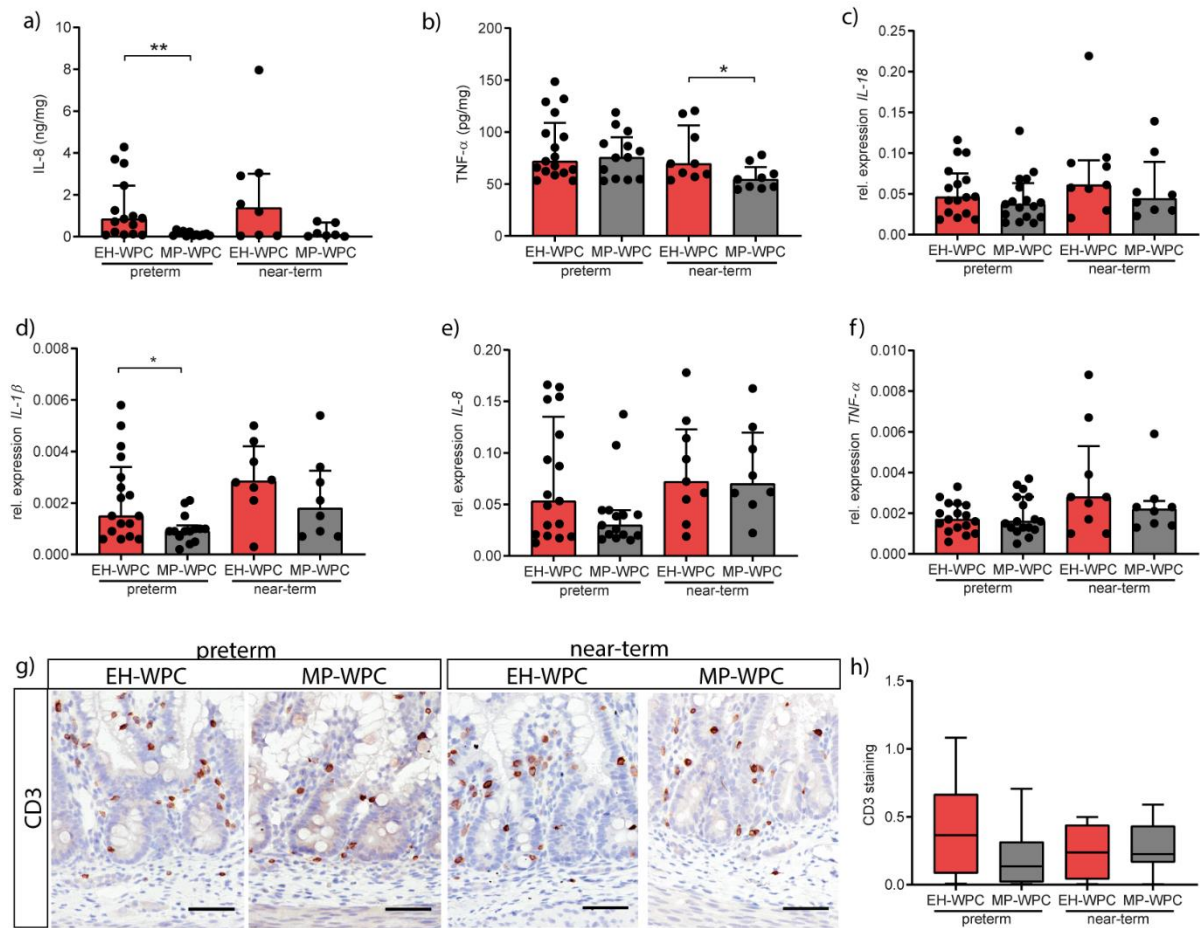

**Figure S2: Distal small intestine and colonic inflammation.** Cytokine levels of (a) IL-8 and (b) TNF- $\alpha$  in colon tissue homogenates as determined by ELISA, and relative expression levels of (c) IL-18 in colon tissue as determined by RT-qPCR. Relative expression levels of pro-inflammatory cytokines (d) IL-1 $\beta$ , (e) IL-8 and (f) TNF- $\alpha$  in the distal small intestine as determined by RT-qPCR. (g) T cells were detected in distal small intestinal tissue by immunohistochemistry staining for CD3, and (h) staining intensity in the crypt region was quantified by ImageJ analysis. Values are median  $\pm$  IQR, \* $p \leq 0.05$  \*\* $p \leq 0.01$ . Scalebar equals 50  $\mu$ m.

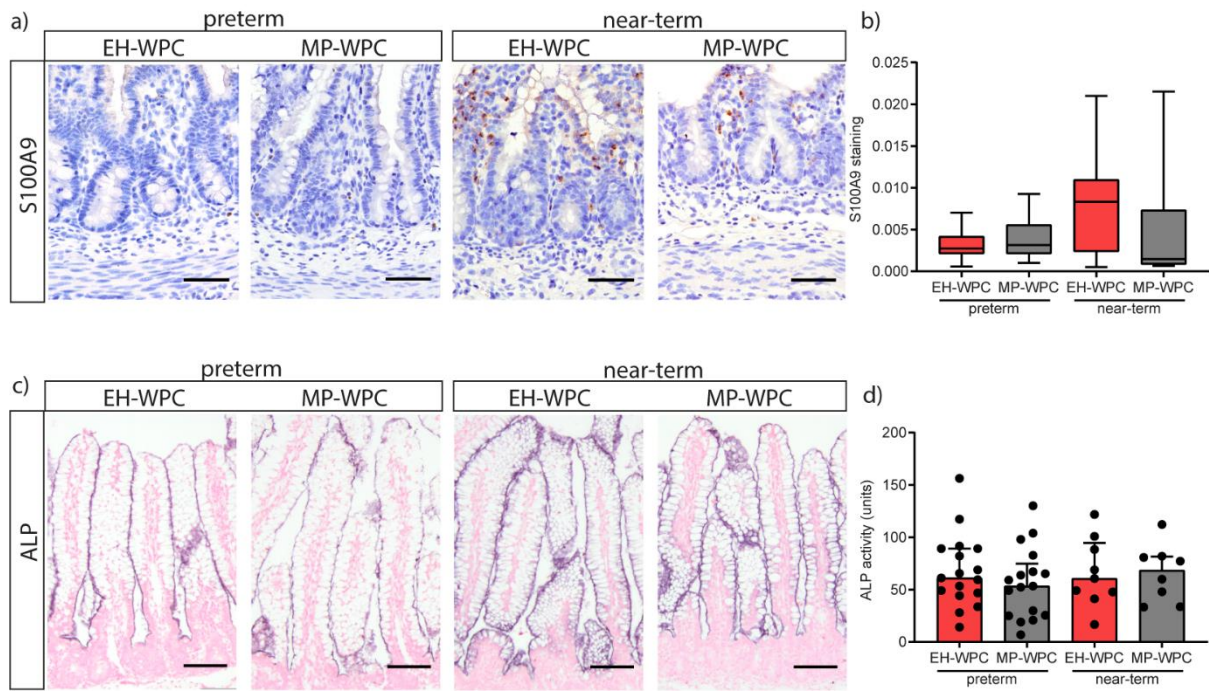

**Figure S3: Innate defense in the immature distal small intestine.** (a) detection of S100A9 by immunohistochemistry in distal small intestinal tissue, with (b) relative staining intensity determined by ImageJ analysis. iALP brush border activity was determined with (c) NBT/BCIP conversion on distal small intestinal tissue slides and (d) pNPP conversion ( $\mu\text{g pNPP} \cdot \text{mg protein} \cdot \text{min}^{-1}$ ) in distal small intestinal tissue homogenates. Values are median  $\pm$  IQR. Scalebar equals 50  $\mu\text{m}$  for (a) and 100  $\mu\text{m}$  for (c).

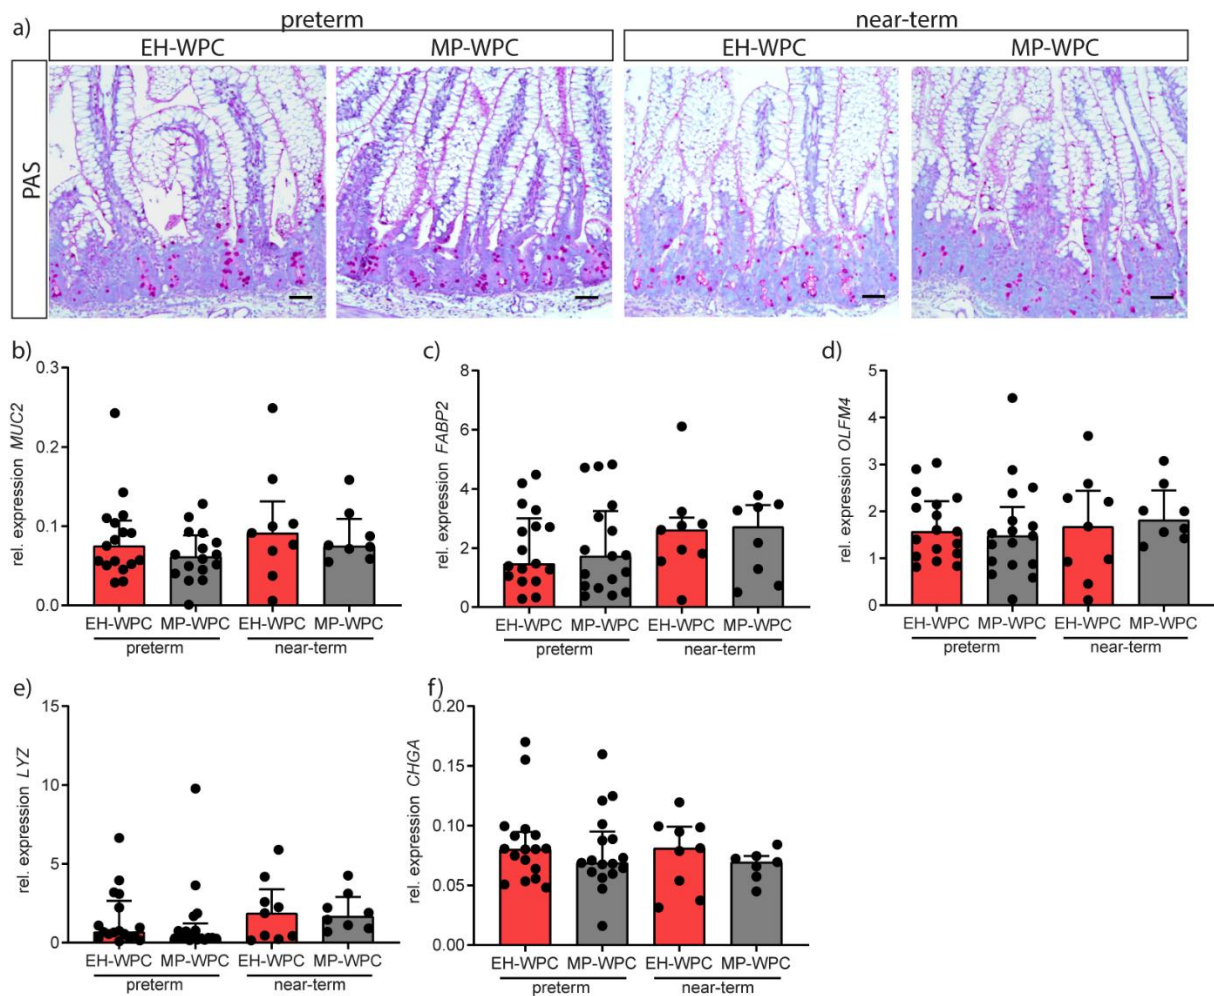

**Figure S4: Epithelial cell types in the immature small intestine.** (a) detection of mucin-containing cells in distal small intestinal tissue by PAS staining, with relative expression levels of (b) *MUC2* in distal small intestine, as determined by RT-qPCR. Relative expression levels of enterocyte marker (c) *FABP2*, stem cell marker (d) *OLFM4*, paneth cell marker (e) *LYZ* and enteroendocrine cell marker (f) *CHGA* in the distal small intestine as determined by RT-qPCR. Values are median  $\pm$  IQR, scalebar equals 50  $\mu\text{m}$ .
